# Supplementary material
Source: publisher site journal article supplement (https://www.dovepress.com/article/359908)
Supplement: Supplementary file 1 [file get_supplementary_file.php]

**
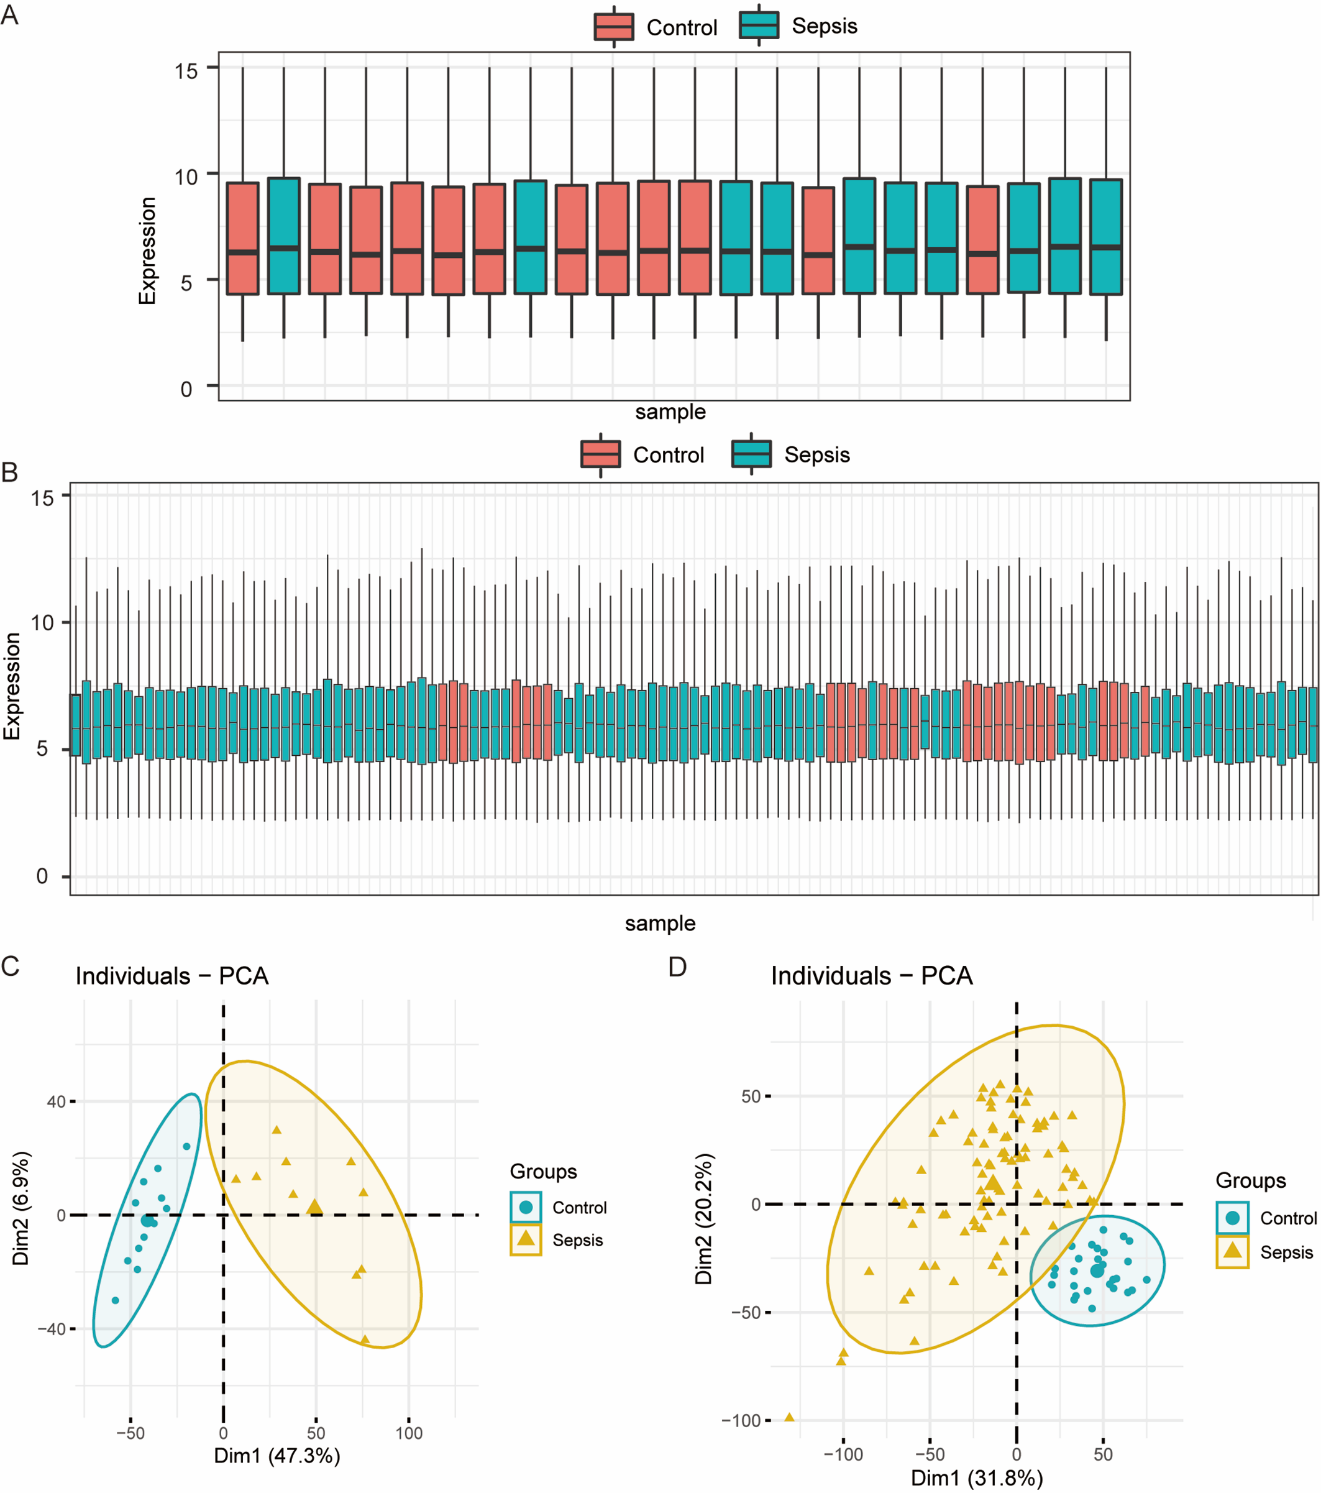
**

**Supplementary figure 1** Quality control of transcriptome data. **(A-B)** The average expression levels of in GSE145227 and GSE26440 expression matrices after correction. **(C-D)** The principal component analysis results of the GSE145227 and GSE26440 expression matrices.


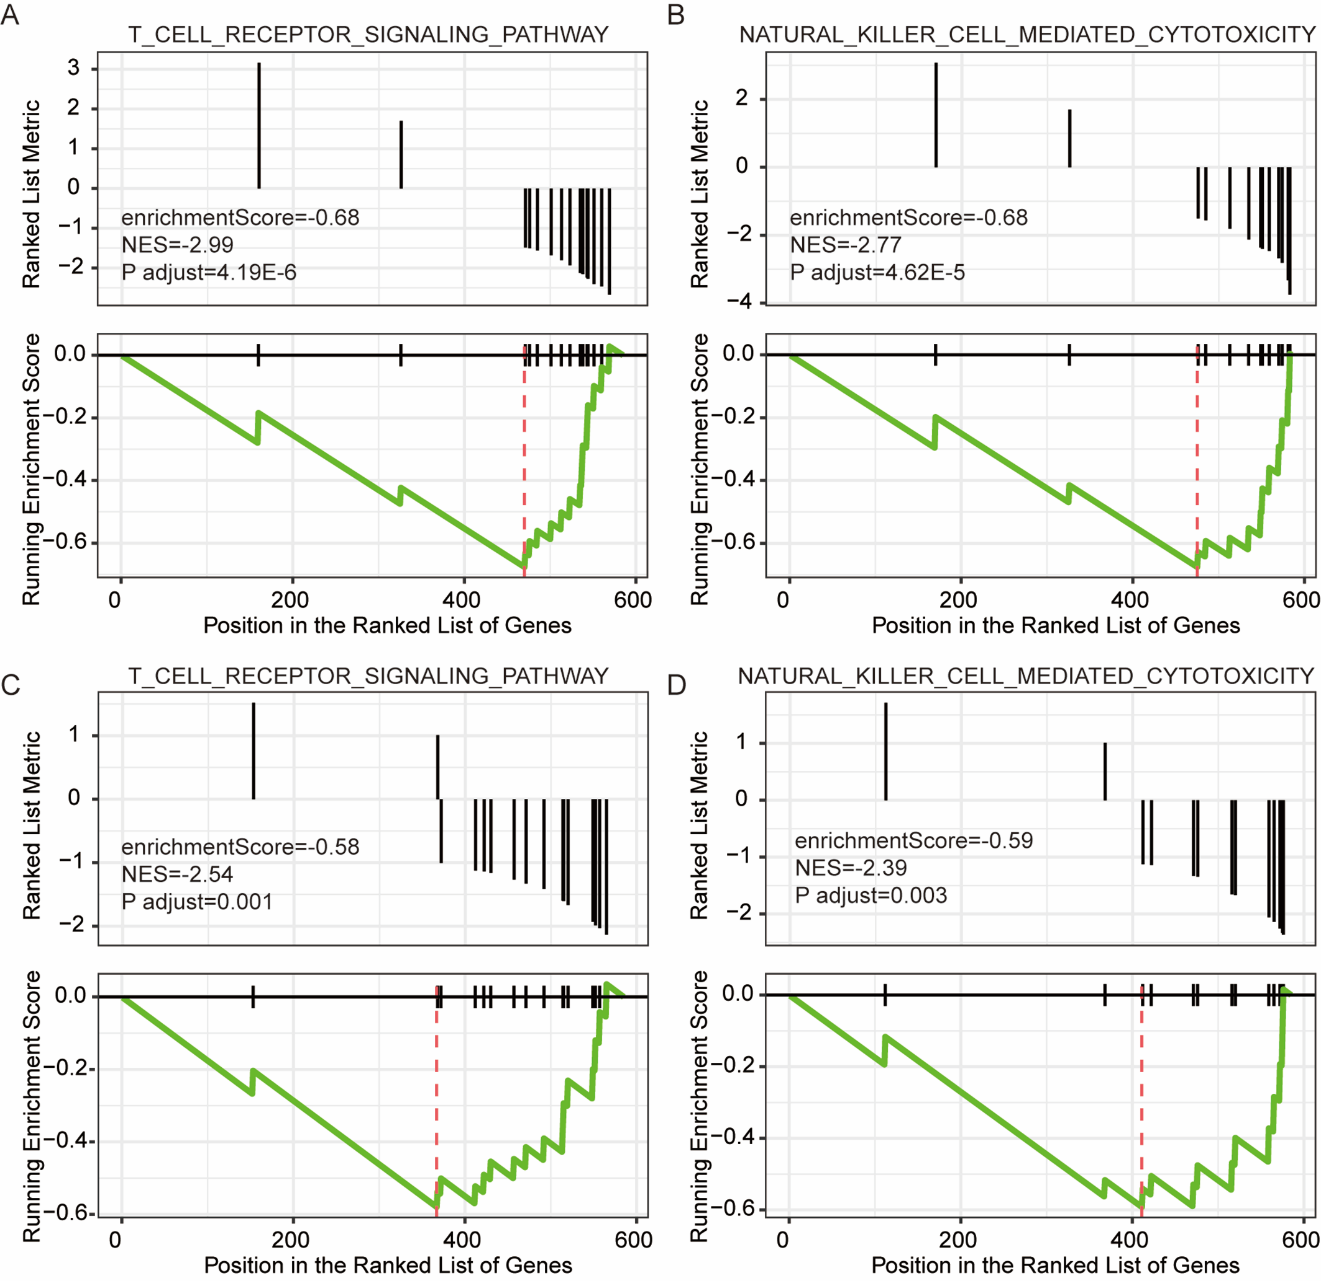


**Supplementary figure 2** Gene set enrichment analysis (GSEA) results of differentially expressed genes (DEGs). (A-B) The enrichment analysis of pathways of the GSEA genes in the GSE145227 dataset. (C-D) The enrichment analysis of pathways of the GSEA genes in the GSE26440 dataset. The *P* values were determined by the Kolmogorov–Smirnov test.


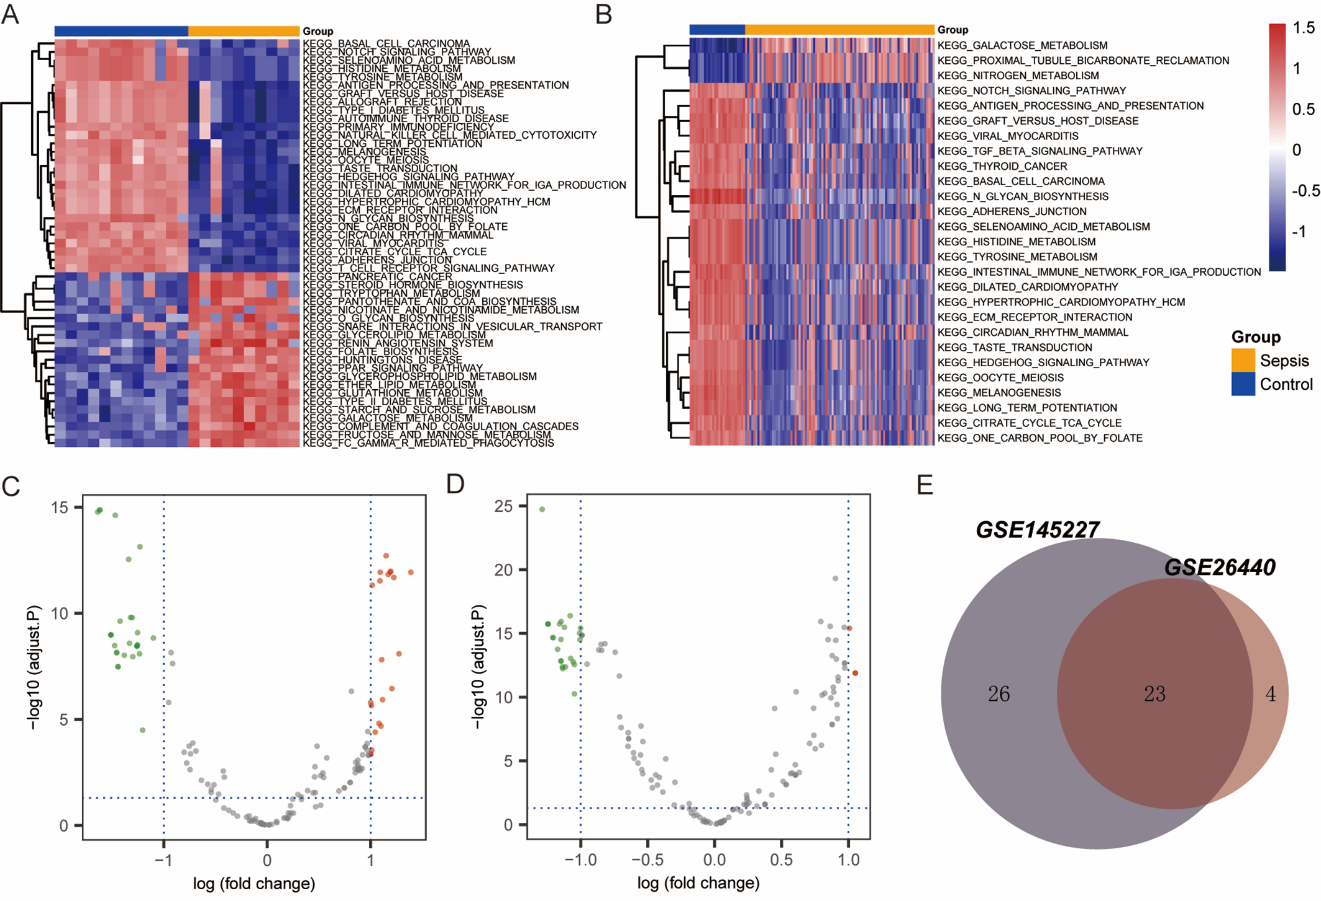


**Supplementary figure 3** Gene set variation analysis (GSVA) results of differentially expressed genes. **(A-B)** The enrichment scores of the pathways with differences between GSE145227 and GSE26440 are displayed in the form of heatmaps. **(C-D)** Volcano plots of GSVA differential pathways between GSE145227 and GSE26440. The screening threshold was set as an adjusted *P* < 0.05, |log2 fold change| > 1, red dots represent upregulated pathways, and green dots represent downregulated pathways. **(E)** Venn diagram of the pathways enriched in the two datasets. A total of 23 pathways were shared by the results of both datasets.


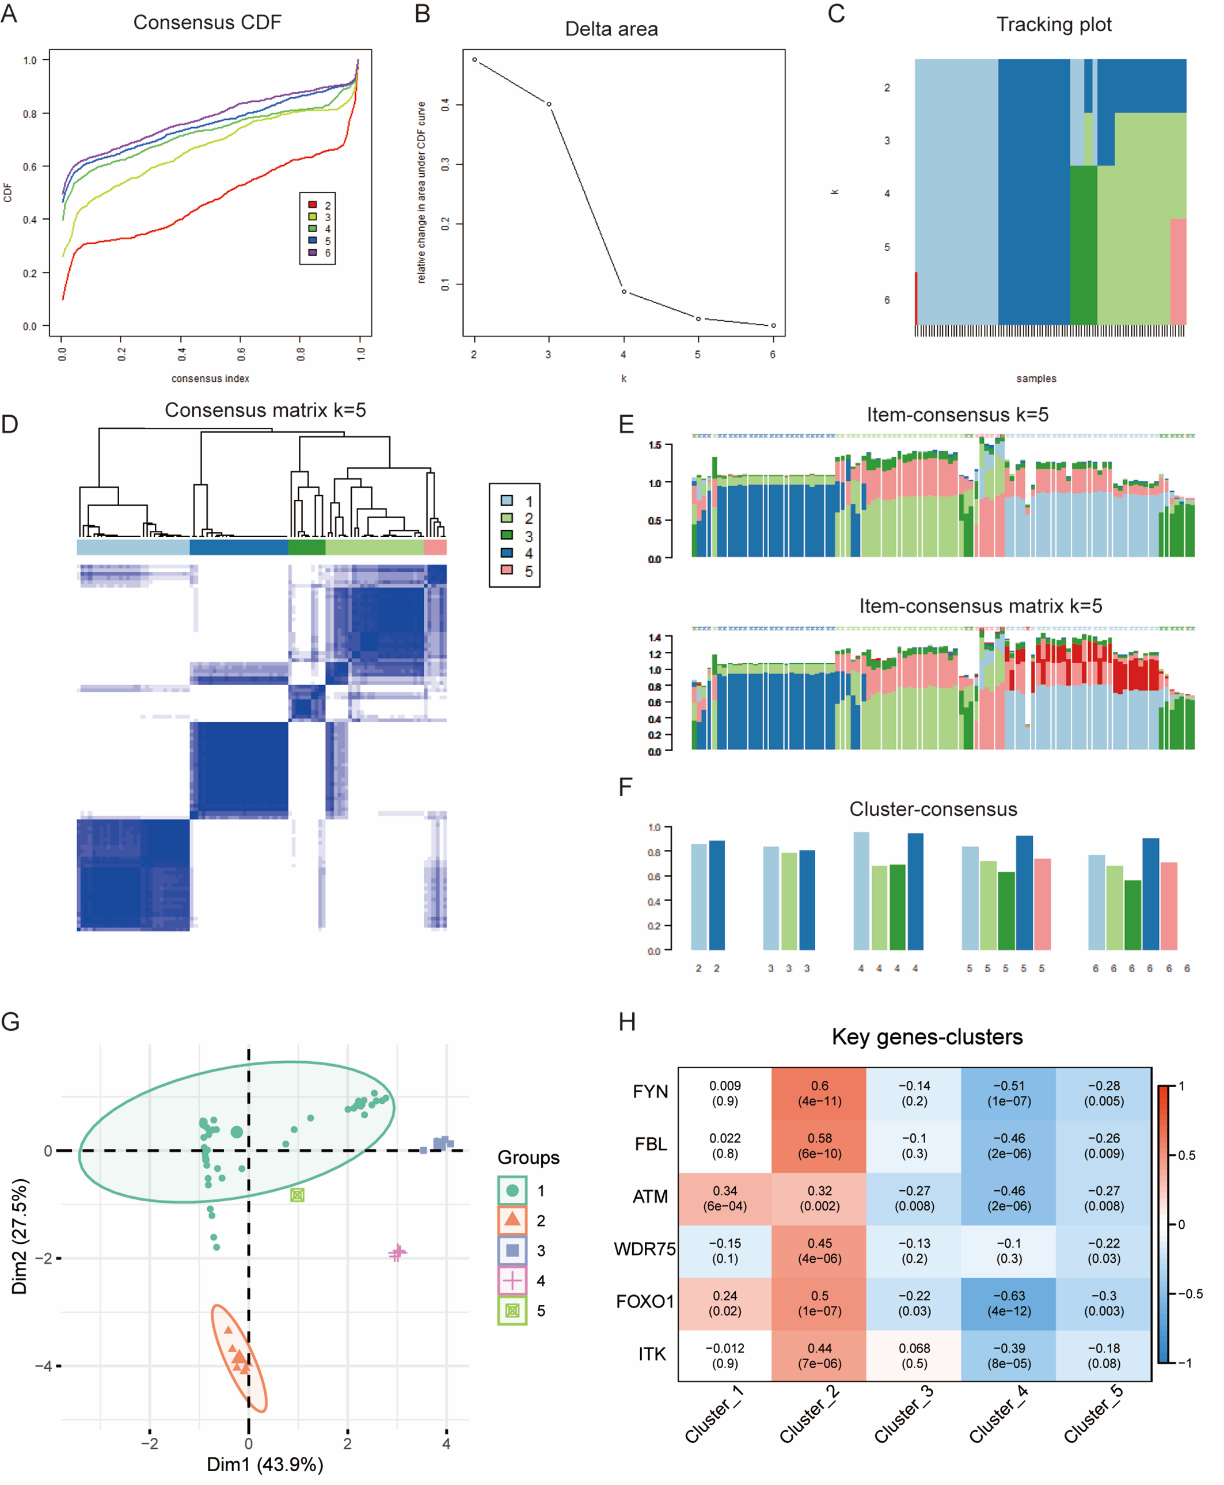


**Supplementary figure 4** Analysis of the molecular subtypes of sepsis. **(A-F)** The process of molecular subtype construction. When k=5, the increase in the area under the cumulative distribution function (CDF) curve significantly decreased. Panel E shows that compared with that when k=6, the composition of molecular subtypes between samples was more consistent when k=5. Clustering with k=5 was used. **(G)** Principal component analysis between samples based on the molecular subtype scores. The results showed a clear distinction. **(H)** The correlation matrix between the obtained molecular subtype scores and immune cell infiltration. Red indicates a positive correlation, and blue indicates a negative correlation. The darker the colour, the higher the degree of correlation. The correlation coefficient and *P* value are displayed in the grid in the matrix.


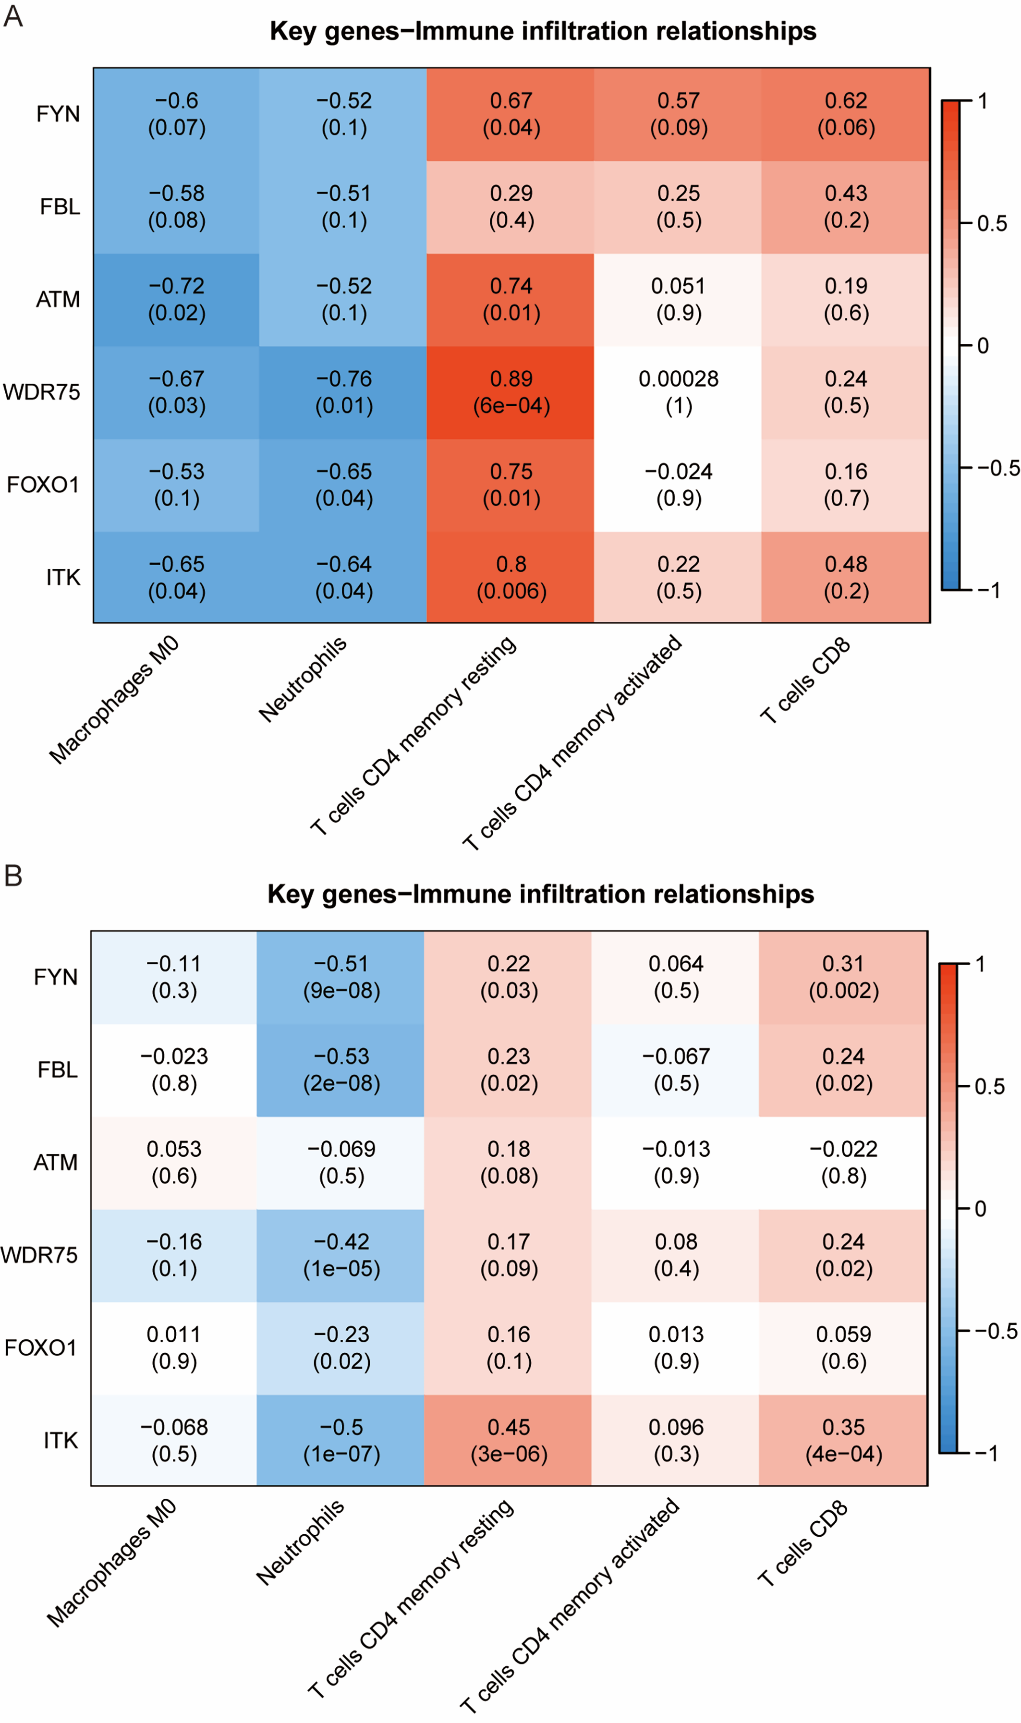


**Supplementary figure 5** Correlation matrix between the key genes of (A) GSE145227 or (B) GSE26440 and the degree of immune cell infiltration. Red indicates a positive correlation, blue indicates a negative correlation. The darker the colour, the higher the degree of correlation. The correlation coefficient and *P* value are displayed in the grid in the matrix.

**Supplementary table 1** The primer pairs used in qPCR.

| Primer name | Forward（5'-3'） | Reverse（5'-3'） |
| --- | --- | --- |
| ITK | CCCTCAGAGCTCACTTTTGTG | CTTGTCCTTGTTGAGCCAGTAG |
| FYN | ATGGGCTGTGTGCAATGTAAG | GAAGCTGGGGTAGTGCTGAG |
| ATM | GAAGTCTTGCATTTGAAGAAGG | TGTTCGTAGTCTAGTAATGGGT |
| FBL | AGTCGAGTTCTCCCACCGCT | AATCCGGGTCTGGTCTGGCT |
| WDR75 | TAGCATGTCACCCAACGGAAG | GGTGCCTGTCACTGAAAAAGC |
| FOXO1 | GGGTTAGTGAGCAGGTTACAC | TCCAATGGCACAGTCCTTATC |
| GAPDH | AGCCACATCGCTCAGACAC | GCCCAATACGACCAAATCC |

**Supplementary table 2** Results of KEGG analysis.

| ID | Description | GeneRatio | BgRatio | *p*.adjust | Count |
| --- | --- | --- | --- | --- | --- |
| hsa04640 | Hematopoietic cell lineage | 19/307 | 99/8111 | 1.07E-06 | 19 |
| hsa04658 | Th1 and Th2 cell differentiation | 17/307 | 92/8111 | 6.56E-06 | 17 |
| hsa05235 | PD-L1 expression and PD-1 checkpoint pathway in cancer | 16/307 | 89/8111 | 1.64E-05 | 16 |
| hsa04659 | Th17 cell differentiation | 17/307 | 107/8111 | 3.23E-05 | 17 |
| hsa04380 | Osteoclast differentiation | 18/307 | 128/8111 | 7.35E-05 | 18 |
| hsa04660 | T cell receptor signaling pathway | 16/307 | 104/8111 | 7.35E-05 | 16 |
| hsa05321 | Inflammatory bowel disease | 11/307 | 65/8111 | 0.001111 | 11 |
| hsa05202 | Transcriptional misregulation in cancer | 20/307 | 192/8111 | 0.001284 | 20 |
| hsa04610 | Complement and coagulation cascades | 12/307 | 85/8111 | 0.002415 | 12 |
| hsa05166 | Human T-cell leukemia virus 1 infection | 20/307 | 219/8111 | 0.006424 | 20 |
| hsa04613 | Neutrophil extracellular trap formation | 18/307 | 190/8111 | 0.007648 | 18 |
| hsa05142 | Chagas disease | 12/307 | 102/8111 | 0.010467 | 12 |
| hsa05221 | Acute myeloid leukemia | 9/307 | 67/8111 | 0.019087 | 9 |
| hsa05150 | Staphylococcus aureus infection | 11/307 | 96/8111 | 0.019285 | 11 |
| hsa05134 | Legionellosis | 8/307 | 57/8111 | 0.023495 | 8 |
| hsa04650 | Natural killer cell mediated cytotoxicity | 13/307 | 131/8111 | 0.023495 | 13 |
| hsa04930 | Type II diabetes mellitus | 7/307 | 46/8111 | 0.025993 | 7 |
| hsa04064 | NF-kappa B signaling pathway | 11/307 | 104/8111 | 0.029023 | 11 |
| hsa04910 | Insulin signaling pathway | 13/307 | 137/8111 | 0.029736 | 13 |
| hsa05140 | Leishmaniasis | 9/307 | 77/8111 | 0.033646 | 9 |
| hsa05340 | Primary immunodeficiency | 6/307 | 38/8111 | 0.037434 | 6 |
| hsa04750 | Inflammatory mediator regulation of TRP channels | 10/307 | 98/8111 | 0.048465 | 10 |
| hsa04664 | Fc epsilon RI signaling pathway | 8/307 | 68/8111 | 0.048465 | 8 |

**Supplementary table 3** Results of GO analysis.

| ID | Description | GeneRatio | BgRatio | p.adjust | Count |
| --- | --- | --- | --- | --- | --- |
| BP:0043312 | neutrophil degranulation | 101/562 | 487/18866 | 8.16E-53 | 101 |
| BP:0002283 | neutrophil activation involved in immune response | 101/562 | 490/18866 | 8.16E-53 | 101 |
| BP:0042110 | T cell activation | 60/562 | 483/18866 | 5.87E-18 | 60 |
| BP:0001819 | positive regulation of cytokine production | 54/562 | 447/18866 | 1.68E-15 | 54 |
| BP:0030098 | lymphocyte differentiation | 46/562 | 368/18866 | 1.28E-13 | 46 |
| BP:0030217 | T cell differentiation | 38/562 | 253/18866 | 1.28E-13 | 38 |
| BP:0007159 | leukocyte cell-cell adhesion | 42/562 | 364/18866 | 3.67E-11 | 42 |
| BP:1903039 | positive regulation of leukocyte cell-cell adhesion | 33/562 | 235/18866 | 6.55E-11 | 33 |
| BP:0022409 | positive regulation of cell-cell adhesion | 36/562 | 279/18866 | 6.55E-11 | 36 |
| BP:1903037 | regulation of leukocyte cell-cell adhesion | 39/562 | 329/18866 | 8.84E-11 | 39 |
| MF:0140375 | immune receptor activity | 22/570 | 135/18352 | 1.42E-07 | 22 |
| MF:0004715 | non-membrane spanning protein tyrosine kinase activity | 11/570 | 46/18352 | 3.74E-05 | 11 |
| MF:0003953 | NAD+ nucleosidase activity | 7/570 | 16/18352 | 3.74E-05 | 7 |
| MF:0050135 | NAD(P)+ nucleosidase activity | 7/570 | 16/18352 | 3.74E-05 | 7 |
| MF:0061809 | NAD+ nucleotidase, cyclic ADP-ribose generating | 7/570 | 16/18352 | 3.74E-05 | 7 |
| MF:0050786 | RAGE receptor binding | 6/570 | 11/18352 | 4.57E-05 | 6 |
| MF:0004896 | cytokine receptor activity | 14/570 | 97/18352 | 0.000192 | 14 |
| MF:0038187 | pattern recognition receptor activity | 7/570 | 23/18352 | 0.000414 | 7 |
| MF:0005536 | glucose binding | 5/570 | 11/18352 | 0.000967 | 5 |
| MF:0004875 | complement receptor activity | 5/570 | 12/18352 | 0.001405 | 5 |
| CC:0042581 | specific granule | 49/570 | 160/19559 | 6.99E-34 | 49 |
| CC:0070820 | tertiary granule | 47/570 | 164/19559 | 3.00E-31 | 47 |
| CC:0034774 | secretory granule lumen | 54/570 | 322/19559 | 1.16E-23 | 54 |
| CC:0060205 | cytoplasmic vesicle lumen | 54/570 | 326/19559 | 1.62E-23 | 54 |
| CC:0031983 | vesicle lumen | 54/570 | 328/19559 | 1.76E-23 | 54 |
| CC:0030667 | secretory granule membrane | 52/570 | 306/19559 | 2.56E-23 | 52 |
| CC:0035580 | specific granule lumen | 24/570 | 62/19559 | 1.78E-19 | 24 |
| CC:1904724 | tertiary granule lumen | 20/570 | 55/19559 | 1.42E-15 | 20 |
| CC:0070821 | tertiary granule membrane | 22/570 | 73/19559 | 3.28E-15 | 22 |
| CC:0005766 | primary lysosome | 28/570 | 155/19559 | 3.28E-13 | 28 |

**Supplementary table 4** Results of GSEA analysis.

| ID | setSize | enrichmentScore | NES | *p*.adjust | qvalues | rank | leading_edge | core_enrichment |
| --- | --- | --- | --- | --- | --- | --- | --- | --- |
| **GSE145227** |
| KEGG_T cell receptor signalling pathways | 16 | -0.67642 | -2.99043 | 4.19E-06 | 3.67E-06 | 116 | tags=88%, list=20%, signal=72% | CBLB/FYN/LCK/ITK/ZAP70/RASGRP1/NFATC2/CD3D/CD3E/PRKCQ/CD28/CD247/CD3G/CD8A |
| KEGG_ natural killer cell-mediated cytotoxicity | 13 | -0.67552 | -2.77019 | 4.62E-05 | 4.05E-05 | 111 | tags=85%, list=19%, signal=70% | FYN/LCK/ZAP70/NFATC2/PRF1/CD247/SH2D1A/GZMB/KLRD1/SH2D1B/KLRC3 |
| **GSE26440** |
| KEGG_T cell receptor signalling pathways | 16 | -0.57977 | -2.53876 | 0.000987 | 0.00078 | 219 | tags=94%, list=37%, signal=60% | PIK3CB/CBLB/ZAP70/FYN/CD8A/CD3E/NFATC2/PRKCQ/CD3D/CD3G/LCK/CD28/ITK/RASGRP1/CD247 |
| KEGG_ natural killer cell-mediated cytotoxicity | 13 | -0.59198 | -2.39562 | 0.002915 | 0.002301 | 175 | tags=85%, list=30%, signal=61% | ZAP70/FYN/NFATC2/GZMB/PRF1/LCK/KLRD1/CD247/KLRC3/SH2D1A/SH2D1B |
